# Supplementary material for: UV-Visible radiation modulation abilities of photon up-converting nanocapsules integrated with an oscillatory reaction
Source: Royal Society of Chemistry journal article supplement (doi:10.1039/d2tc00709f), 2022-01-01
Supplement: d2tc00709f1.pdf [file d2tc00709f1.pdf]

## Electronic Supporting Information

### UV-Visible radiation modulation abilities of photon Up-Converting nanocapsules integrated with an oscillatory reaction

Giulia Quaglia<sup>a</sup>, Beatrice Bartolomei<sup>a</sup>, Pier Luigi Gentili<sup>a</sup> and Loredana Latterini<sup>a\*</sup>

<sup>a</sup> Dipartimento di Chimica, Biologia e Biotecnologie - Università degli Studi di Perugia, via Elce di Sotto, 8, 06123 Perugia, Italy  
E-mail: loredana.latterini@unipg.it

#### Content:

|                                                                                                                                                                                                                           |        |
|---------------------------------------------------------------------------------------------------------------------------------------------------------------------------------------------------------------------------|--------|
| - Scheme of UC-NC synthetic process.                                                                                                                                                                                      | page 2 |
| - AT-IR spectrum of UC-NC solid powder.                                                                                                                                                                                   | page 2 |
| - UV-Vis absorption spectrum of UC-NC powder in Kubelka-Munk units.                                                                                                                                                       | page 3 |
| - EDX mapping and spectra of upconverting nanocapsules.                                                                                                                                                                   | Page 3 |
| - Characterization of PtOEP/DPA in oleic acid solution                                                                                                                                                                    | page 3 |
| - Phosphorescence decay fit of PtOEP in toluene,<br>oleic acid in absence and presence of DPA and in UC-NC powder<br>Table with the phosphorescence decay times.                                                          | page 4 |
| - MEM distribution of PtOEP in toluene and oleic acid in absence of DPA<br>and in UC-NC.                                                                                                                                  | page 5 |
| - Fuzzy entropies values (H) for different samples in different conditions.                                                                                                                                               | page 5 |
| - Phosphorescence spectra of PtOEP in toluene and oleic acid solution and UC-NC recorded at<br>different O <sub>2</sub> concentrations.                                                                                   | page 5 |
| - Mechanism of Belousov-Zhabotinsky (B-Z) reaction.                                                                                                                                                                       | page 6 |
| - Transmittance evolution spectrum and kinetic profile of B-Z.                                                                                                                                                            | page 6 |
| - Intensity of signals at 430 nm Vs irradiation time upon excitation at 360 nm (with oscillatory<br>radiation) and 535 nm                                                                                                 | page 7 |
| - Table and scheme of the amplitude variation of the output signal of DPA in presence of a double<br>excitation (360 nm + 535 nm), referred to the amplitude of the same signal obtained with a<br>single input (360 nm). | page 7 |

- Intensity of signals at 645 nm Vs irradiation time upon excitation at 360 nm (with oscillatory radiation) and 535 nm.

page 8

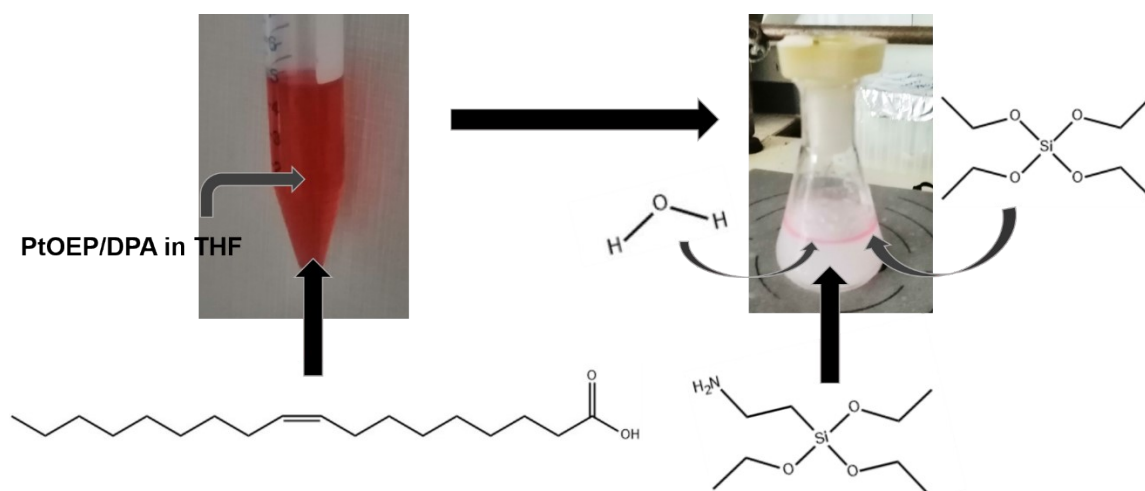

**Scheme S1** UC-NC synthetic process.

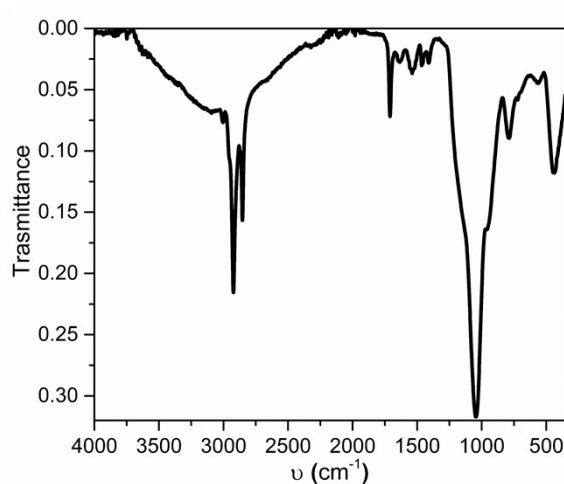

**Figure S1** ATR-IR Spectrum of upconverting nanocapsules.

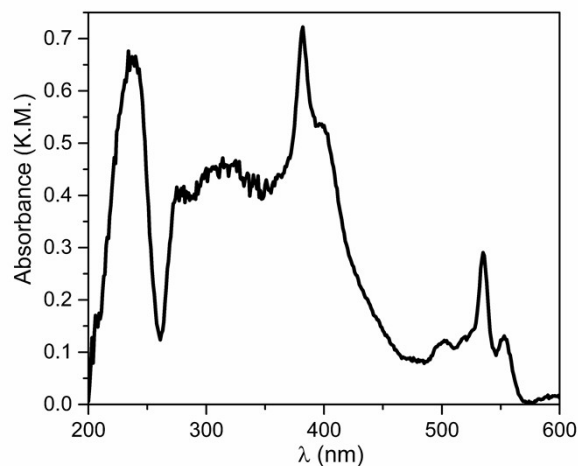

**Figure S2** UV-Vis absorption spectrum (in Kubelka-Munk units) of upconverting nanocapsules.

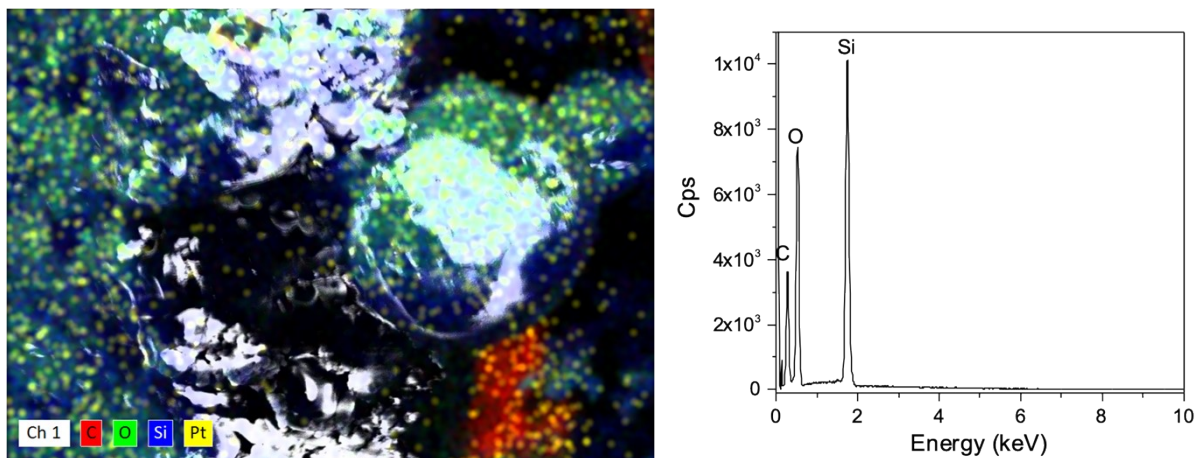

**Figure S3.** EDX mapping and spectra of upconverting nanocapsules.

### Characterization of PtOEP/DPA in oleic acid solution

UC- emission spectrum of PtOEP/DPA in oleic acid has been measure and monitored as a function of the excitation power (Figure S3), generated by a 450 W xenon lamp. The sample was not previous deoxygenated.

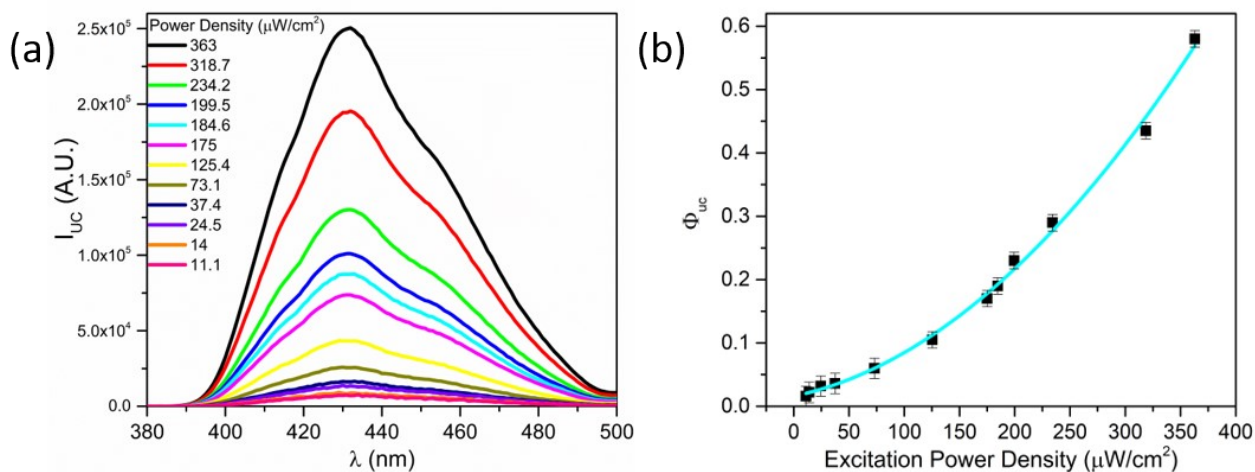

**Figure S4** a) upconversion emission of PtOEP-DPA system in oleic acid solution. b) upconversion quantum yield vs excitation power density plot for PtOEP-DPA system in oleic acid solution.

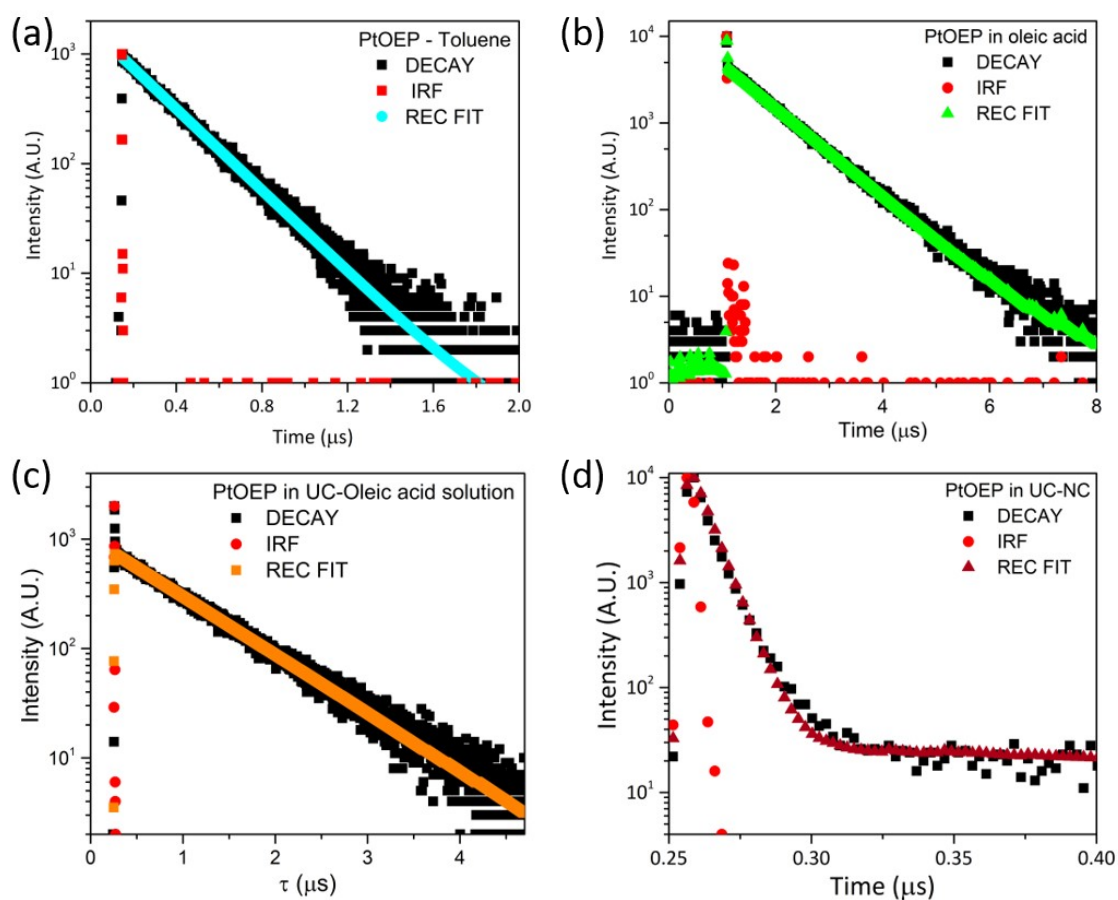

**Figure S5** Phosphorescence decays of PtOEP in toluene (a), oleic acid (b); Phosphorescence decays of PtOEP in the presence of DPA in oleic acid solution (c) and in UC-NC solid-like powder (d) registered in aerated conditions.

**Table S1** Luminescence decays parameters of PtOEP in toluene, oleic acid in the absence and in the presence of DPA and in UC-NC.

| $\lambda_{\text{exc}} - \lambda_{\text{em}}$ (nm) | Detected emission                     | Average Decay<br>From MEM distributions      |
|---------------------------------------------------|---------------------------------------|----------------------------------------------|
| 510 nm – 645 nm                                   | PtOEP in toluene                      | $\tau_1 = 75.2$ ns<br>$\tau_2 = 235$ ns      |
| 510 nm – 645 nm                                   | PtOEP in OA solution                  | $\tau_1 = 410$ ns<br>$\tau_2 = 1.01$ $\mu$ s |
| 510 nm – 645 nm                                   | PtOEP in UC-OA solution<br>(with DPA) | $\tau_1 = 2.35$ ns<br>$\tau_2 = 818.6$ ns    |
| 510 nm – 645 nm                                   | PtOEP in UC-NC<br>(with DPA)          | $\tau_1 = 1.8$ ns<br>$\tau_2 = 6.8$ ns       |

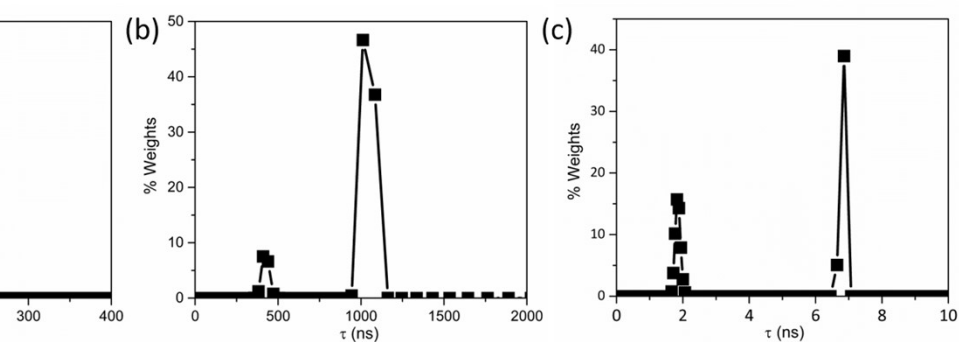

**Figure S6** MEM analysis of PtOEP in toluene (a) and oleic acid (b) in absence of DPA and in solid-like powder UC-NC (c).

**Table S2** Fuzzy Entropy (H) values determined for the different samples in different excitation conditions.

| Sample           | $\lambda_{\text{exc}}$ (nm)<br>[Excitation condition] | Fuzzy Entropy (H) |
|------------------|-------------------------------------------------------|-------------------|
| DPA in OA        | [direct]                                              | 0.11              |
| DPA in UC-NC     | [direct]                                              | 0.29              |
| PtOEP in Toluene | [direct]                                              | 0.19              |

|                  |          |      |
|------------------|----------|------|
| PtOEP in OA      | [direct] | 0.21 |
| PtOEP in UC-NC   | [direct] | 0.27 |
| UC signal by DPA | [UC]     | 0.59 |

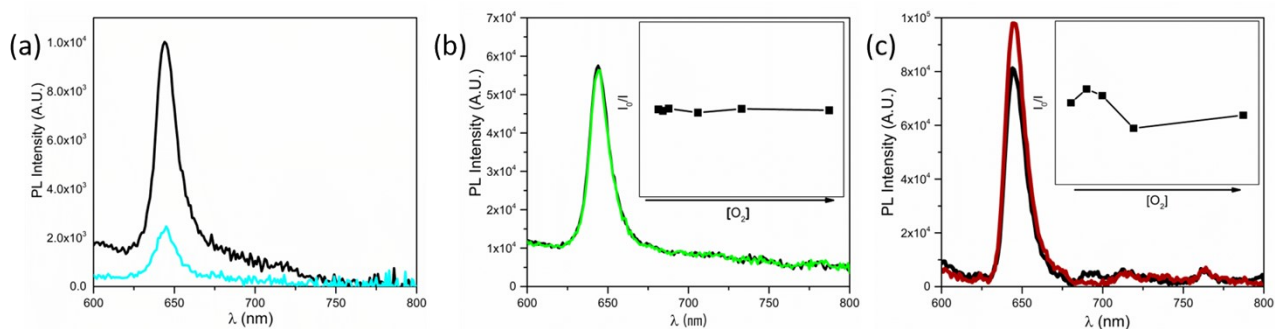

**Figure S7** Phosphorescence spectra of PtOEP in toluene (A) and oleic acid (B) solution, and UC-NC (C) registered at different intervals of time of  $O_2$  flow. Insert: Plot of  $I_0/I$  as a function of oxygen flow time.

## Mechanism of the Belousov-Zhabotinsky (BZ) reaction

The BZ reaction is a catalysed oxidative bromination of malonic acid, which occurs according to the following equation:

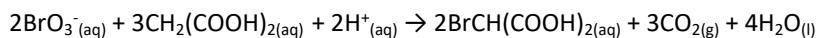

The mechanism of the BZ reaction, catalysed by cerium ions, consists of many elementary steps, which be grouped into three sets of chemical transformations:<sup>1,2</sup>

- 1) The first set consists in non-radical reactions, wherein the overall effect is the consumption of Br<sup>-</sup> and the production of BrCH(COOH)<sub>2</sub>. This step is relevant when the concentration of Br<sup>-</sup> is high (above the critical value of  $5 \times 10^{-6}$  [BrO<sub>3</sub><sup>-</sup>]) and the catalyst is in its reduced state (Ce(III)).
- 2) The second set of elementary steps consists in mono-electronic redox reactions, that occur when the Br<sup>-</sup> concentration is driven below its critical value and the autocatalyst bromous acid becomes the main character. In this stage, Ce(IV) is produced.
- 3) To restore the Ce(III) state, a new set of reactions needs to occur: the bromomalonic acid is oxidized up to CO<sub>2</sub> and H<sub>2</sub>O, consuming Ce(IV) and producing again Br<sup>-</sup>. When [Br<sup>-</sup>] becomes higher than its critical value (i.e., above  $5 \times 10^{-6}$  [BrO<sub>3</sub><sup>-</sup>]), the first set of elementary steps restarts again.

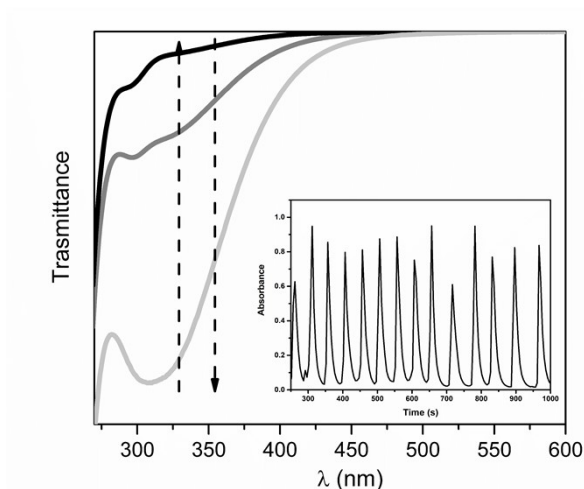

**Figure S8** Transmittance evolution spectra and kinetic profile (insert) of the optical density of Belousov-Zhabotinsky solution.

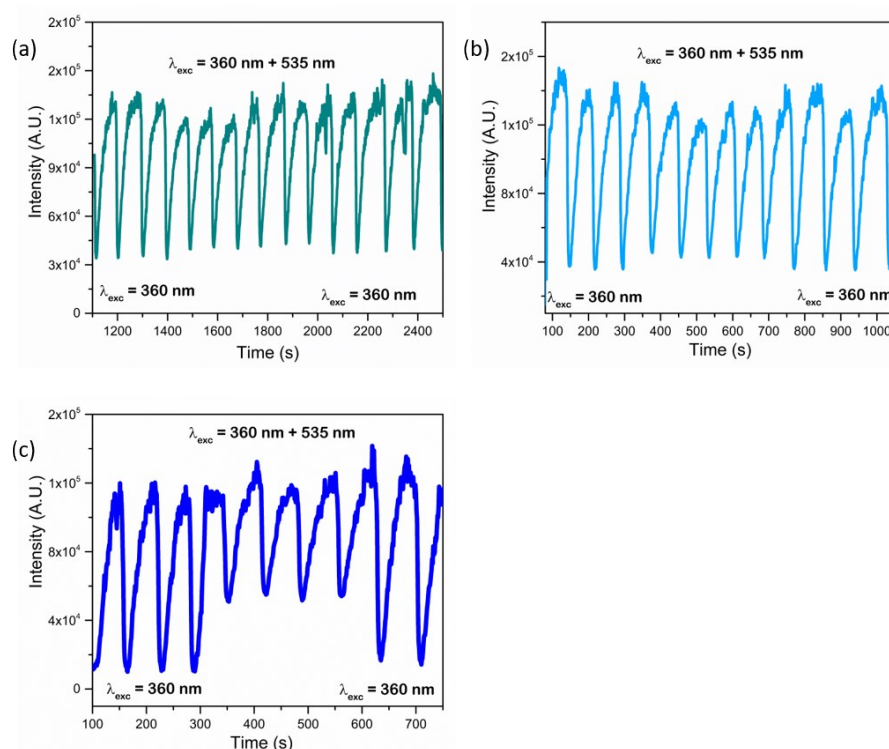

**Figure S9** Intensity of signals at 430 nm Vs irradiation time upon excitation at 360 nm (0-1800 s) and 535 nm (between 600 s and 1200 s) with a power density of 55  $\mu\text{W}/\text{cm}^2$ . Power density at 360 nm of 13 (A) 6 (B) 1 (C)  $\mu\text{W}/\text{cm}^2$ .

**Table S3** Amplitude variation of the output signal of DPA in presence of a double excitation (360 nm + 535 nm), referred to the amplitude of the same signal obtained with a single input (360 nm).

| 360 nm Power excitation<br>( $\mu\text{W}/\text{cm}^2$ ) | $\Delta$ -Amplitude<br>( $I_{360 \text{ nm}} - I_{360 \text{ nm} + 535 \text{ nm}} / I_{360 \text{ nm}}$ ) |
|----------------------------------------------------------|------------------------------------------------------------------------------------------------------------|
| 13                                                       | 0.08                                                                                                       |
| 6                                                        | 0.13                                                                                                       |
| 1                                                        | 0.37                                                                                                       |

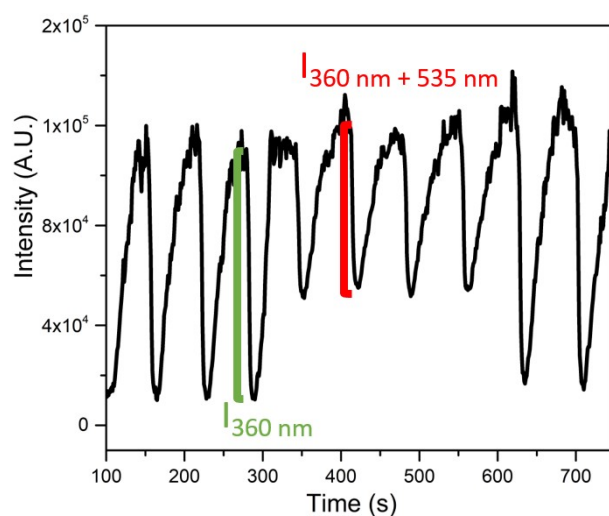

**Scheme S2** Amplitude of the output signal of DPA in presence of single (360 nm, in green) and simultaneous excitation (360 nm plus 535 nm, in red).



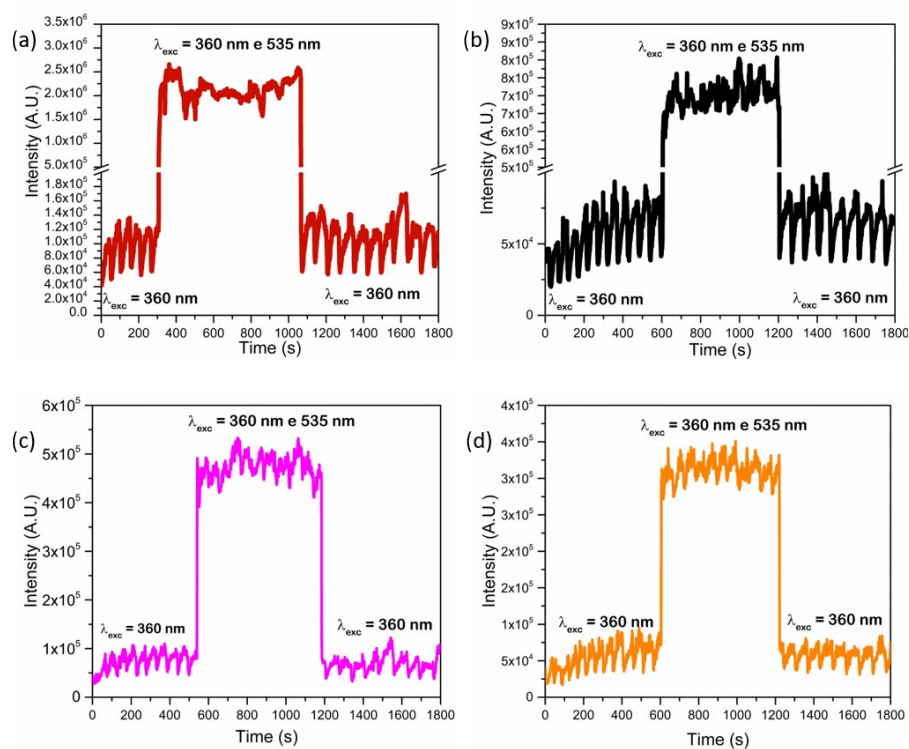

**Figure S10** Intensity of signals at 645 nm Vs irradiation time upon excitation at 360 nm (0-1800 s) and 535 nm (between 600 s and 1200 s) with a power density  $133\mu\text{W}/\text{cm}^2$ ; power density at 535 nm of  $55\mu\text{W}/\text{cm}^2$  (A),  $11\mu\text{W}/\text{cm}^2$  (B)  $5.5\mu\text{W}/\text{cm}^2$  (C)  $2.8\mu\text{W}/\text{cm}^2$  (D).

## References

- 1 P.L. Gentili and J.C. Micheau, *J. of Photochem. Photobiol. C*, 2020, **43**, 10032.
- 2 R. J. Field, E. Koros and R. M. Noyes, *J. Am. Chem. Soc.*, 1972, **94**, 8649–8664.
- 3 C. Clementi, B. Doherty, P.L. Gentili, C. Miliani, A. Romani, B.G. Brunetti, A. Sgamellotti, *Appl. Phys. A*, 2008, **92**, 25-33.
